# Supplementary material for: Balancing intermediate state decay rates for efficient Pr3+ visible-to-UVC upconversion: the case of β-Y2Si2O7:Pr3+
Source: Royal Society of Chemistry journal article supplement (doi:10.1039/c6ra01121g), 2016-01-01
Supplement: c6ra01121g1.pdf [file c6ra01121g1.pdf]

## Supporting Figures

### *Balancing Intermediate State Decay Rates for Efficient Pr<sup>3+</sup> Visible-to-UVC Upconversion: The case of $\beta$ -Y<sub>2</sub>Si<sub>2</sub>O<sub>7</sub>:Pr<sup>3+</sup>*

Cates, Ezra L. and Feifei Li

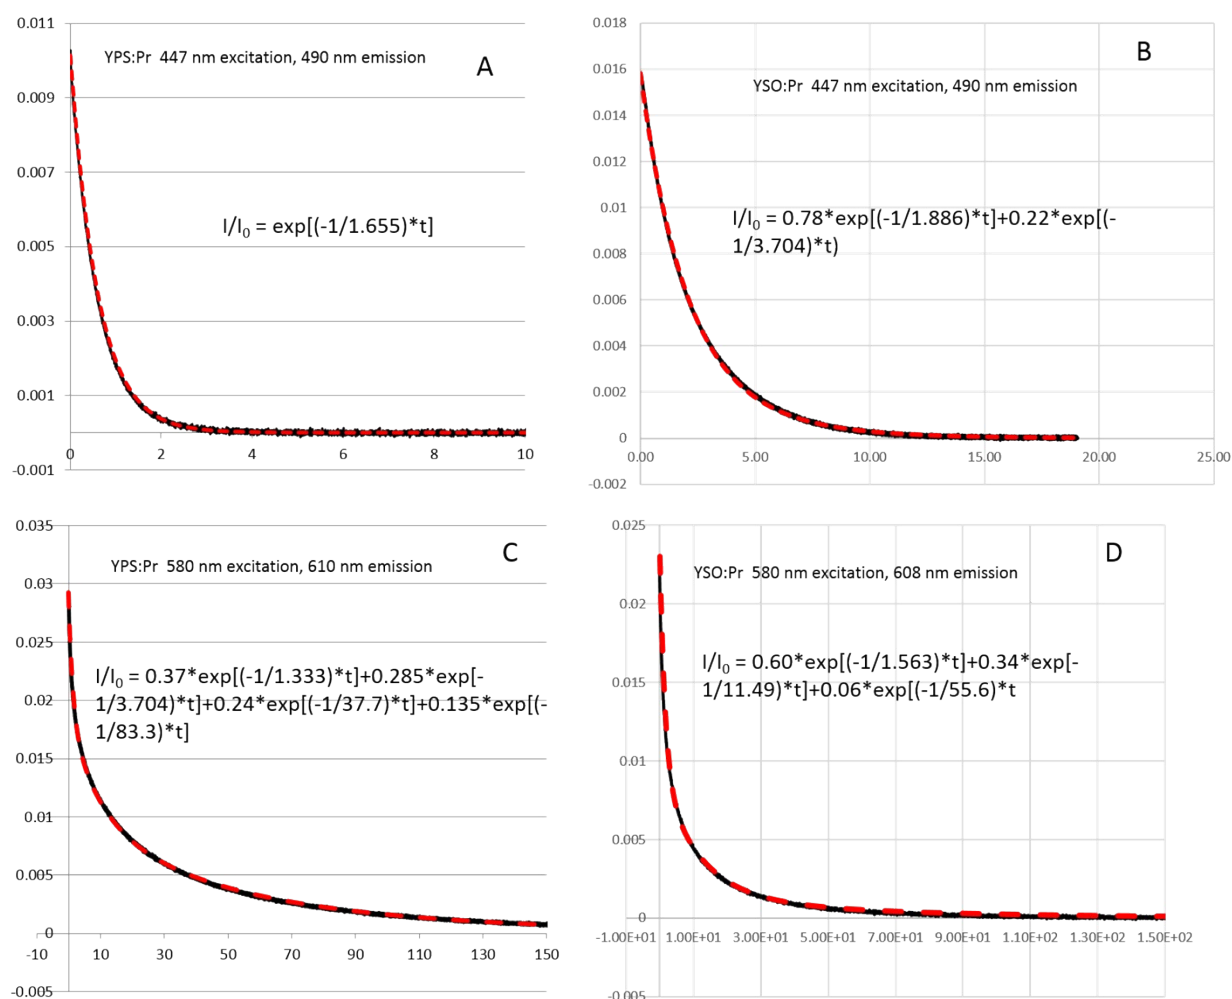

**Figure S1.** Corrected luminescence decay curves (black) and decay fits (red dashed) for YPS:Pr<sup>3+</sup> and YSO:Pr<sup>3+</sup> emissions under pulsed excitation. Y-axis is intensity, zeroed using the straight, fully decayed regions of the curves. X-axis is time in  $\mu$ s, zeroed using the onset of exponential decay following initial signal rise.

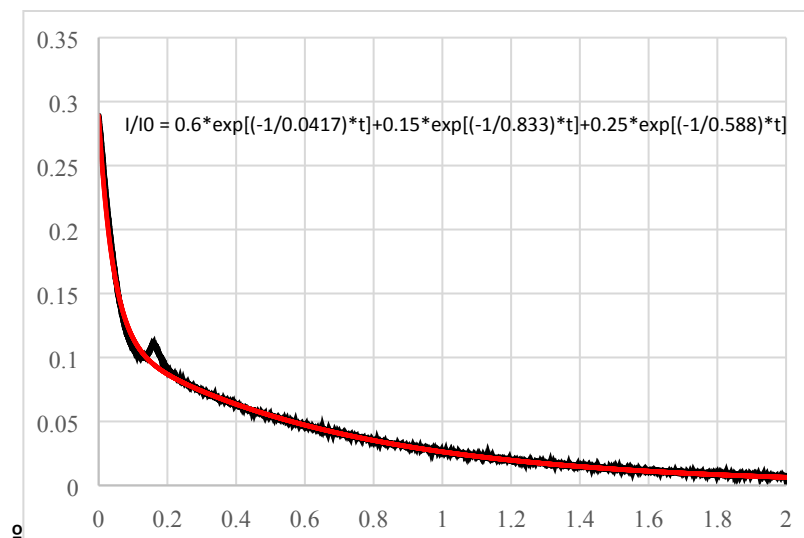

Figure S2. Decay curve (black) and decay fit (red dashed) of YPS:Pr<sup>3+</sup> <sup>3</sup>P<sub>2</sub> emission at 455 nm. Excitation wavelength = 435 nm. X-axis units are  $\mu$ s.

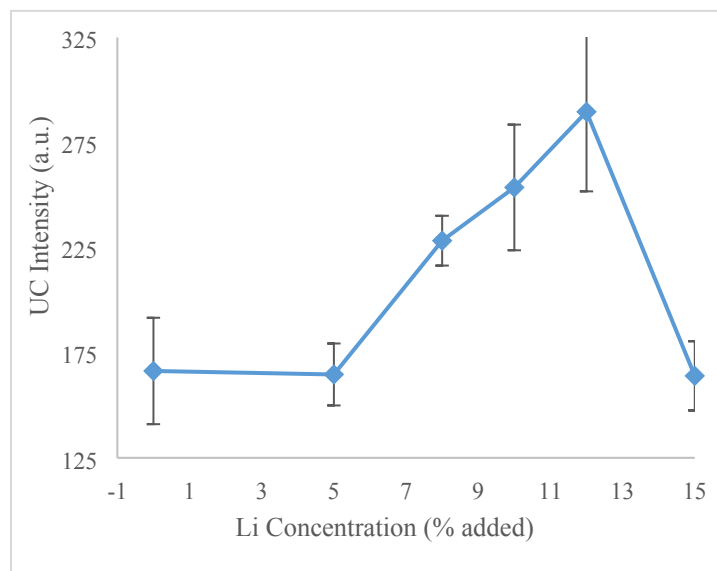

Figure S3. YPS:Pr<sup>3+</sup> ceramics optimization of lithium concentration, expressed as mol.% versus Y<sup>3+</sup> stoichiometry. Pr<sup>3+</sup> concentration was fixed at 1.5 mol.%. Error bars show standard deviation of three separately prepared samples.
